# Supplementary material for: Cyclin K interacts with β-catenin to induce Cyclin D1 expression and facilitates tumorigenesis and radioresistance in lung cancer
Source: PubMed Central journal article supplement (PMC7532664; doi:10.7150/thno.42578), 2020-09-11
Supplement: thnov10p11144s1.pdf [file thnov10p11144s1.pdf]

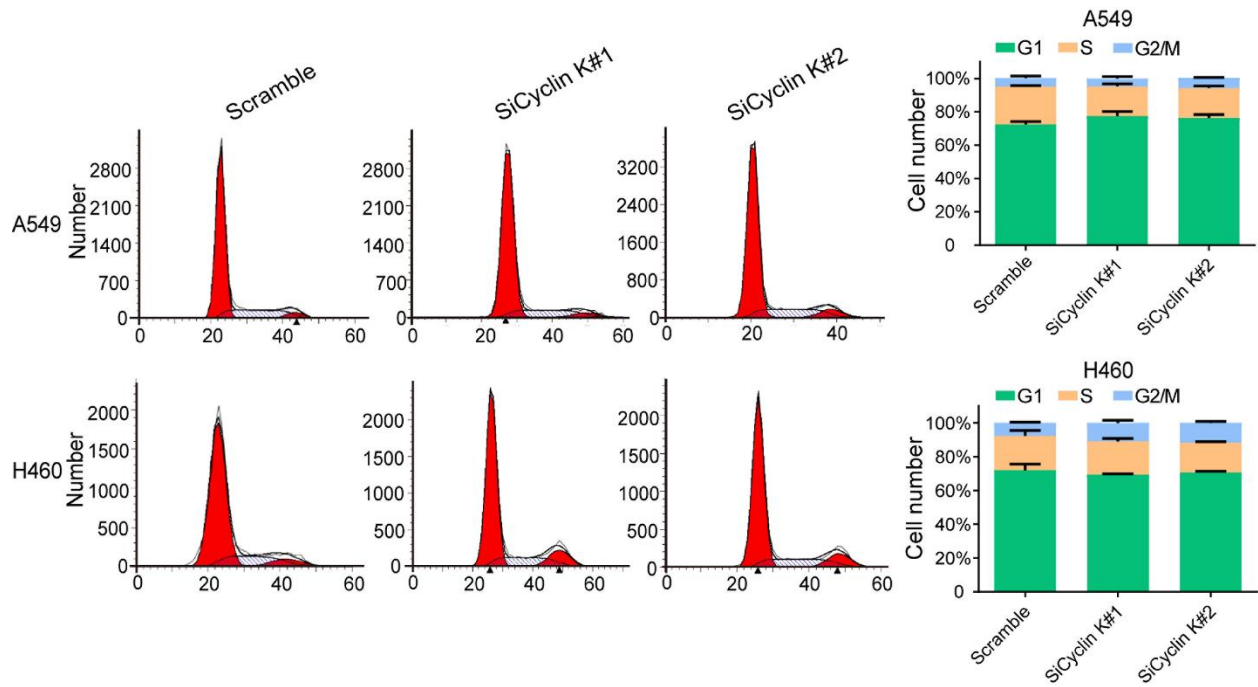

**Figure S1.** A549 and H460 cells transfected with indicated siRNAs for 48 h were collected and analyzed by flow cytometry (n = 3).

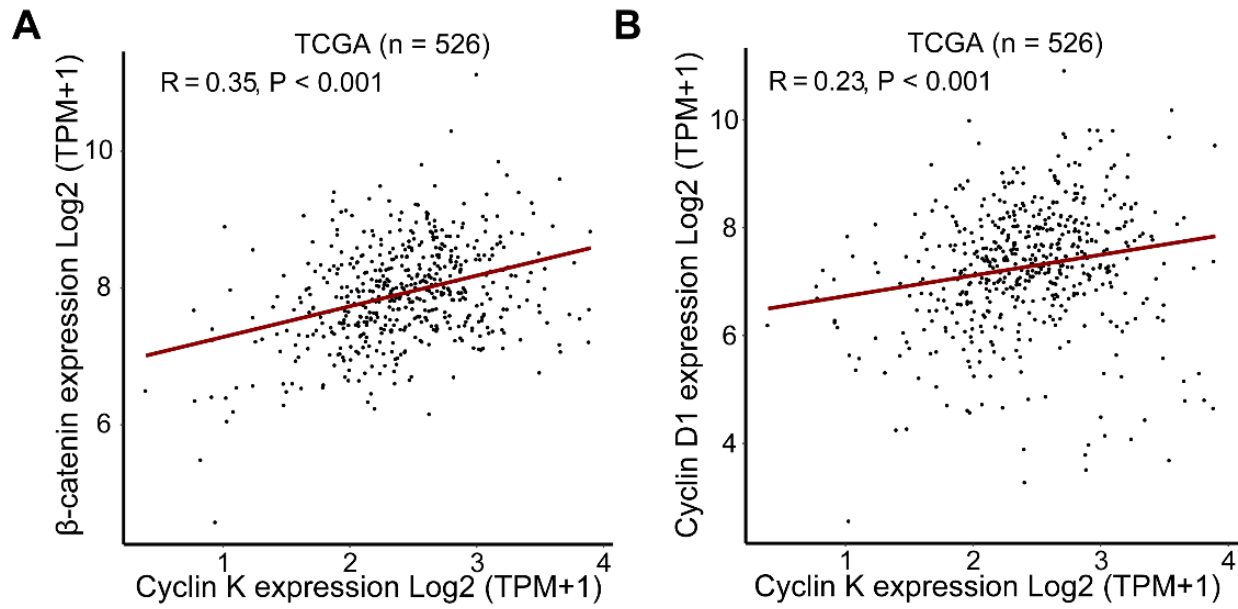

**Figure S2.** Scatterplots of Cyclin K vs  $\beta$ -catenin and Cyclin D1 mRNA expression in lung cancer samples available from TCGA database (n = 526). The Pearson correlation coefficient (R) and p value are shown.

| Genes     | Sequences (5'--3')                                                       | Size (bp) |
|-----------|--------------------------------------------------------------------------|-----------|
| Cyclin K  | F <sup>a</sup> : AAATGACAGTCTCTGCACCACCTT<br>R: ACAAGAATGGACCTCCAAACCCAT | 77        |
| Cyclin D1 | F: CCTCTGTGCCACAGATG<br>R: GGGTCACACTTGATCACTC                           | 144       |
| GNG3      | F: GATAAAGGTGTCCAAGGCAGC<br>R: AACTTCTTCTCCCGGAAGGG                      | 95        |
| PCDH9     | F: CAGGAACATAGGGGATAGTAGCC<br>R: CACCAGAACGGTGACGAAGA                    | 94        |
| WNT9A     | F: GGACTTCCACAACAACCTCG<br>R: GTGCCGTCTCATACTTGTGCT                      | 146       |
| GNG7      | F: ACTAACAACATAGCCCAGGCC<br>R: CTTAAAGGGGTTCTCCGAGG                      | 149       |
| β-catenin | F: CAACTAAACAGGAAGGGATGGAAGG<br>R: CAGATGACGAAGAGCACAGATGG               | 213       |
| c-MYC     | F: CAGCGACTCTGAGGAGGAAC<br>R: TGTGAGGAGGTTTGCTGTGG                       | 110       |
| Axin-2    | F: TGACGGACAGCAGTGTAGATG<br>R: GGTTCTCGGGAATGAGGTAG                      | 103       |
| GAPDH     | F: AGAAGGCTGGGGCTCATTTG<br>R: AGGGGCCATCCACAGTCTTC                       | 137       |

<sup>a</sup> F, forward primer; R, reverse primer.

**Table S1. Sequences of primers used for Real-time quantitative PCR.**

| Features                | Cyclin K expression |     | P value      |
|-------------------------|---------------------|-----|--------------|
|                         | high                | low |              |
| <b>Mean age (years)</b> |                     |     |              |
| 61.915                  | 65                  | 17  |              |
| <b>Age(years)</b>       |                     |     |              |
| ≤60                     | 34                  | 11  | 0.421        |
| >60                     | 31                  | 6   |              |
| <b>Sex</b>              |                     |     |              |
| Male                    | 37                  | 7   | 0.284        |
| Female                  | 28                  | 10  |              |
| <b>Tumor size</b>       |                     |     |              |
| T1(≤3cm)                | 21                  | 9   | 0.290        |
| T2(>3cm, ≤7cm)          | 38                  | 7   |              |
| T3 (>7cm)               | 6                   | 1   |              |
| <b>Stage</b>            |                     |     |              |
| I                       | 19                  | 6   | <b>0.024</b> |
| II                      | 14                  | 9   |              |
| III                     | 31                  | 2   |              |
| IV                      | 1                   | 0   |              |
| <b>T</b>                |                     |     |              |
| 1                       | 12                  | 5   | 0.479        |
| 2                       | 37                  | 10  |              |
| 3                       | 10                  | 2   |              |
| 4                       | 6                   | 0   |              |
| <b>N</b>                |                     |     |              |
| 0                       | 26                  | 6   | 0.954        |
| 1                       | 12                  | 3   |              |
| 2                       | 13                  | 2   |              |
| 3                       | 3                   | 1   |              |
| <b>M</b>                |                     |     |              |
| 0                       | 64                  | 17  | 0.607        |
| 1                       | 1                   | 0   |              |

**Table S2. Association between the clinicopathologic parameters and expression of Cyclin K in human lung cancer tissues.**
